# Supplementary material
Source: bioRxiv or medRxiv preprint supplement (https://www.biorxiv.org/highwire/filestream/86441/field_highwire_adjunct_files/13/090795-7.pdf)
Supplement: Supplementary file [file 090795-7.pdf]

**A**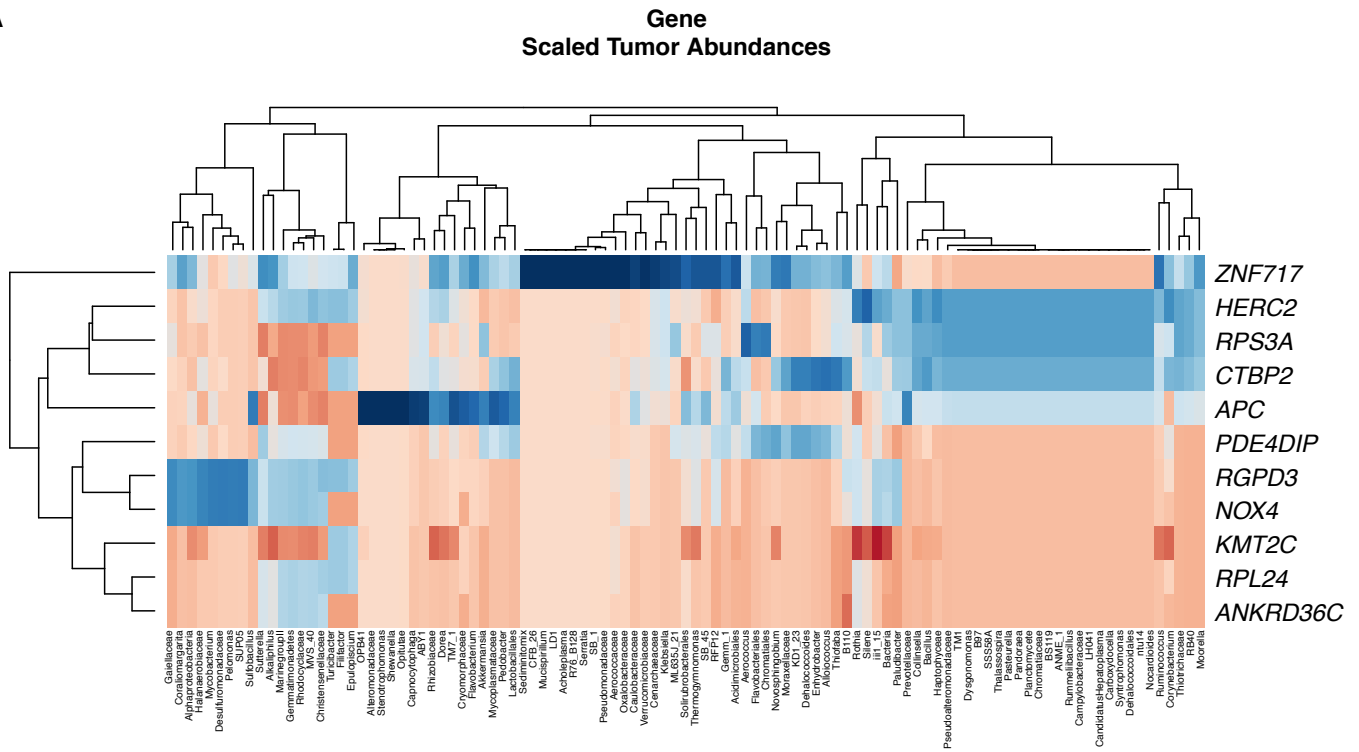**B**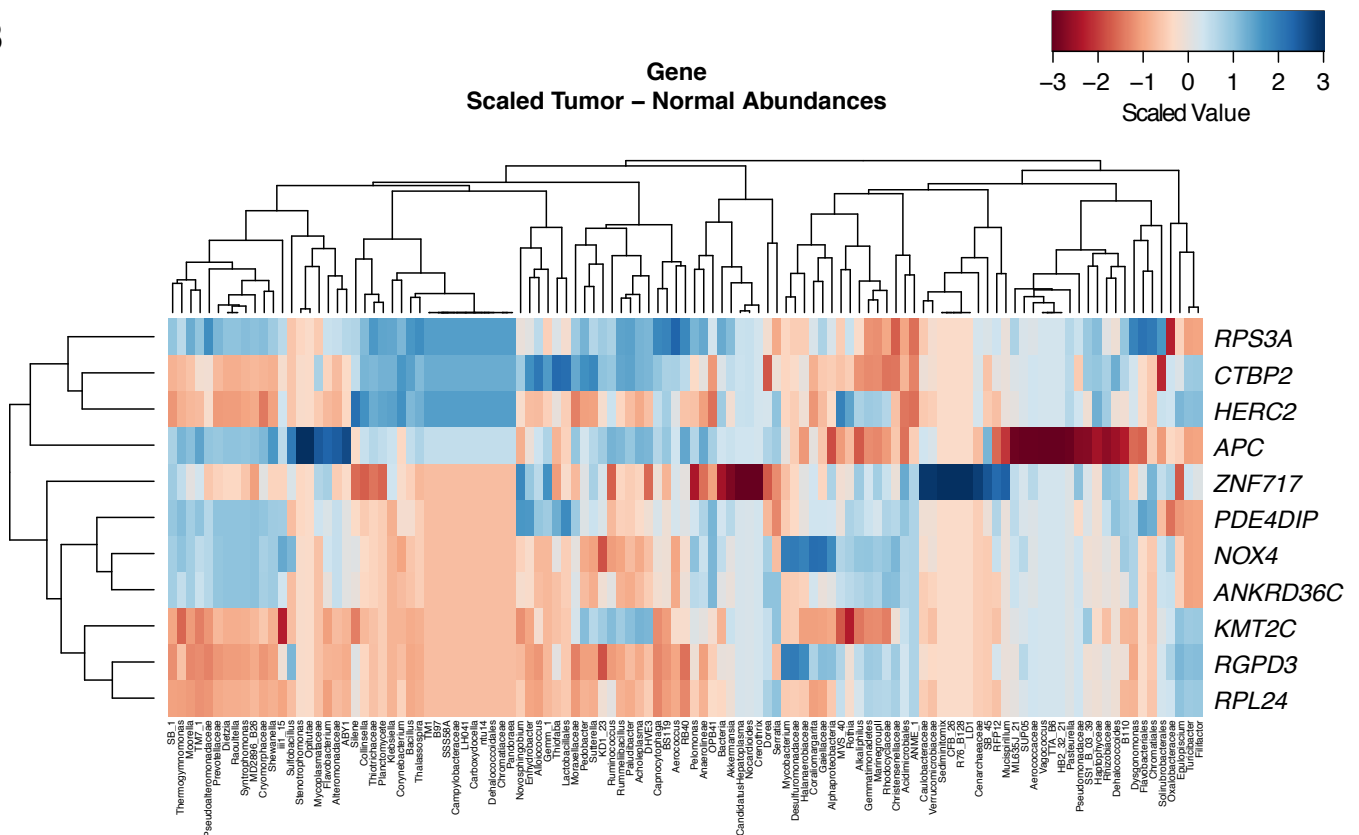

S5 Fig. Heatmaps demonstrating the patterns of microbial abundances for patient samples with prevalent LoF mutations. (A) Scaled taxon abundances (columns) in the tumor samples that harbor LoF mutations in the genes indicated (rows). (B) Scaled differences (tumor abundance - matched normal abundance) patients that harbor tumor-specific LoF mutations in the genes indicated (rows).
